# Supplementary material for: Activated protein C protects from GvHD via PAR2/PAR3 signalling in regulatory T-cells
Source: PubMed Central journal article supplement (PMC5566392; doi:10.1038/s41467-017-00169-4), 2017-08-21
Supplement: 41467_2017_169_MOESM1_ESM.pdf [file 41467_2017_169_MOESM1_ESM.pdf]

File name: Supplementary Information

Description: Supplementary figures and supplementary table.

File name: Peer review file

Description:

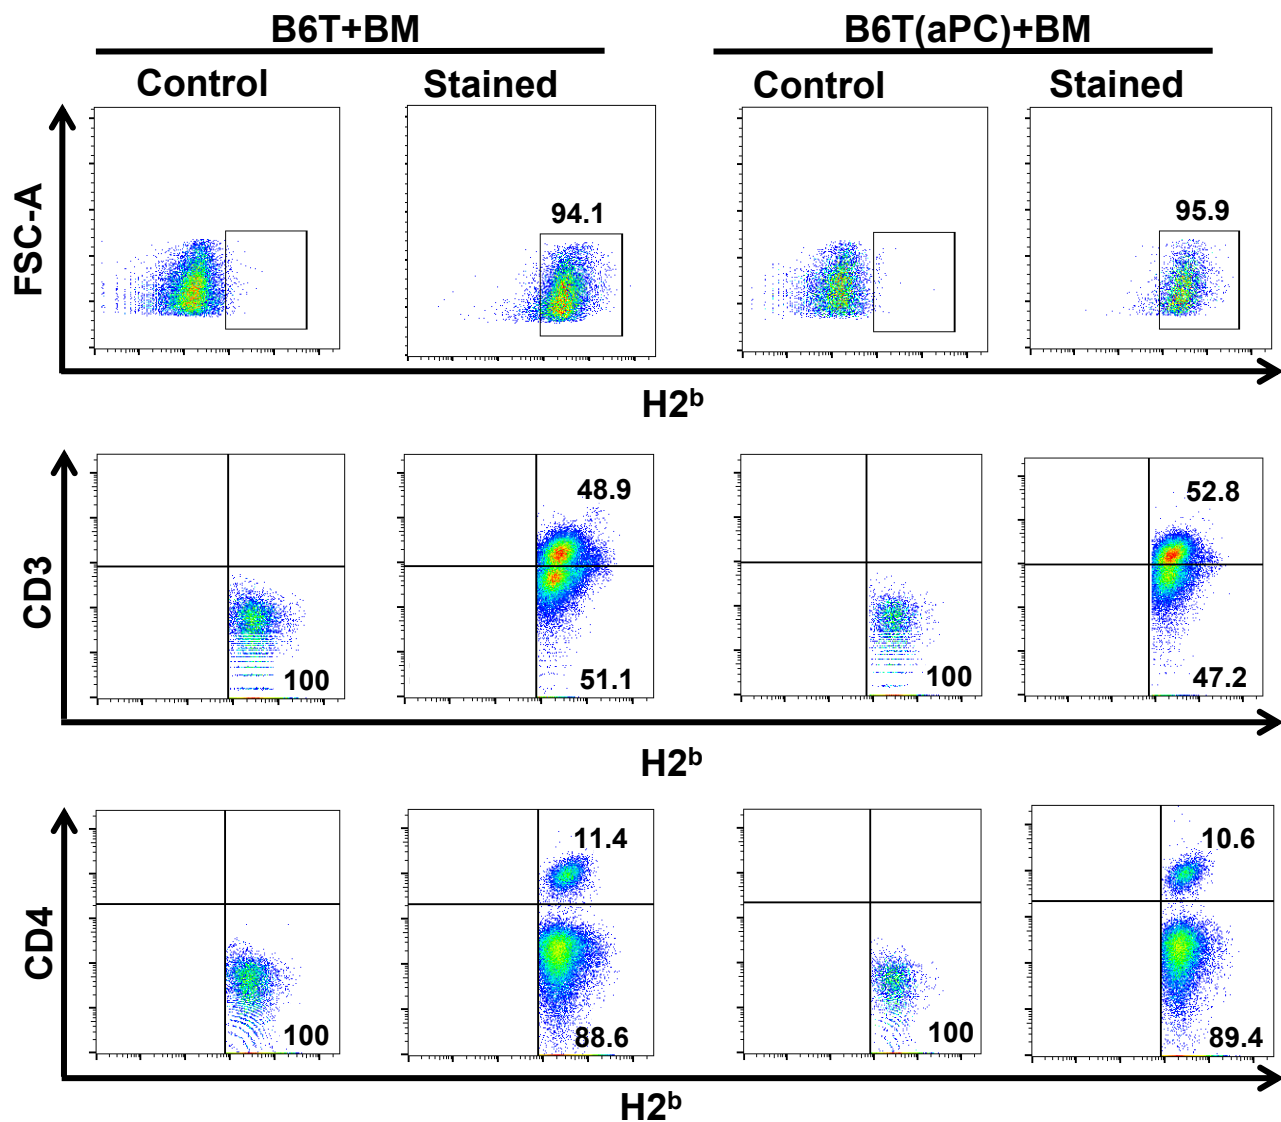

**Supplementary Fig. 1: Engraftment of donor cells (H2<sup>b+</sup>) and donor CD3<sup>+</sup> and CD4<sup>+</sup> T-cells is not altered by aPC-preincubation of T-cells**

Recipient BALB/c mice were lethally irradiated (11Gy) and transplanted with  $5 \times 10^6$  bone marrow and  $0.5 \times 10^6$  T-cells without (B6T+BM) or with (B6T(aPC)+BM) aPC-preincubation (20nM, 1h, 37°C) from donor C57BL/6 wt mice. Recipient mice were sacrificed on day 3 post transplantation, splenic cells were harvested and stained for H2<sup>b</sup>, CD3, or CD4 and analysed by flow cytometry. Control: unstained (top) or stained for H2<sup>b</sup> only (middle, bottom). Representative FACS images are shown.

a

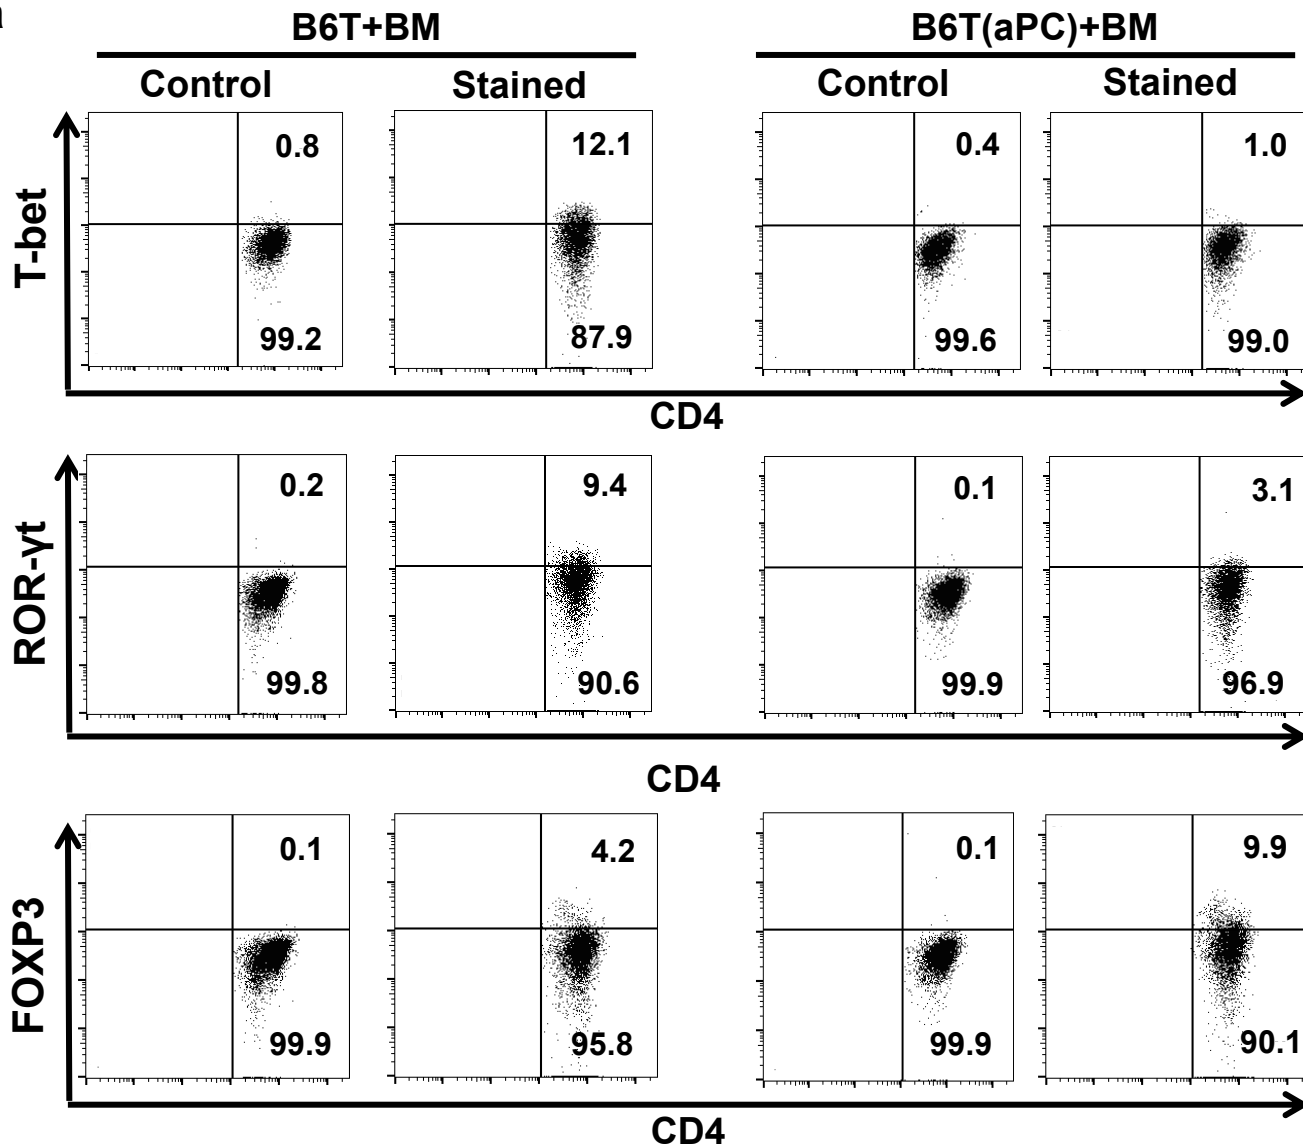

b

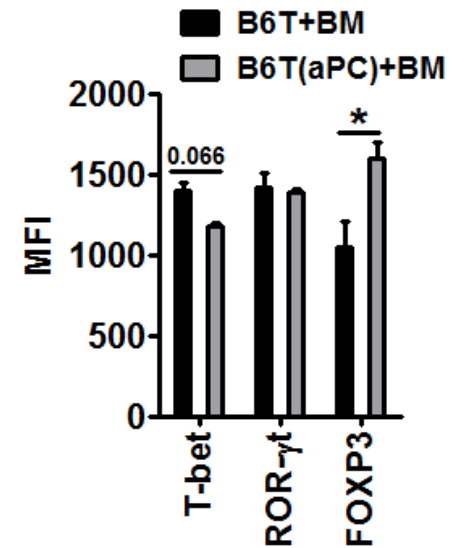

### Supplementary Fig. 2 : Exemplary FACS-scans and MFI corresponding to Fig. 3e

Recipient BALB/c mice were lethally irradiated (11Gy) and transplanted with  $5 \times 10^6$  bone marrow and  $0.5 \times 10^6$  T-cells without (B6T+BM) or with (B6T(aPC)+BM) aPC-preincubation (20nM, 1h, 37°C) from donor C57BL/6 wt mice. Recipient mice were sacrificed 2 weeks post transplantation, splenic T-cells were harvested and stained for H2<sup>b</sup>, CD4, T-bet, ROR- $\gamma$ t, or FOXP3 and analysed by flow cytometry. For T-bet, ROR- $\gamma$ t, and FOXP3 cells were gated on H2<sup>b</sup>CD4<sup>+</sup> cells. Control: stained for H2<sup>b</sup> and CD4. Representative FACS images (a) and Mean Fluorescence Intensity (b, MFI, Mean value  $\pm$  SEM; N=5 each group) are shown; \*P<0.05 (b: t-test).

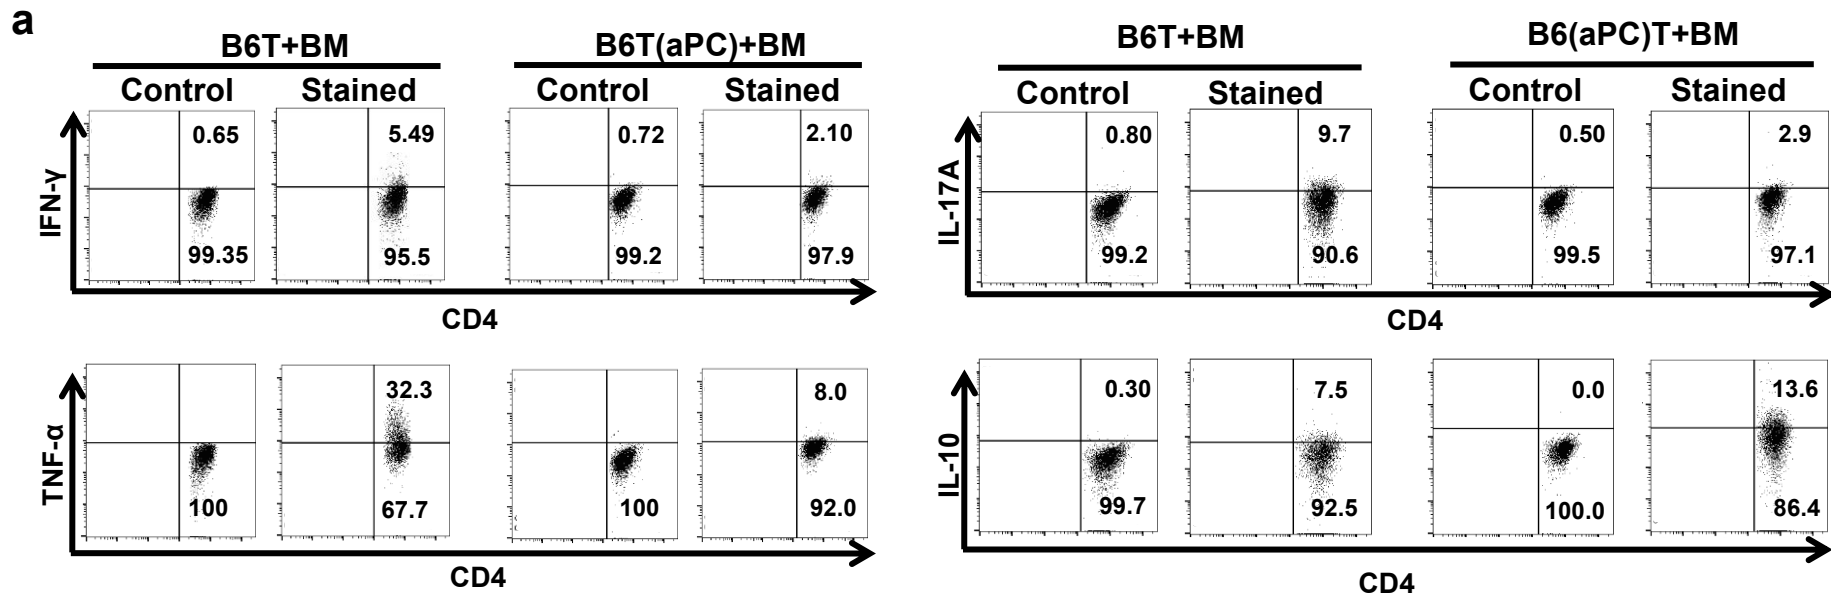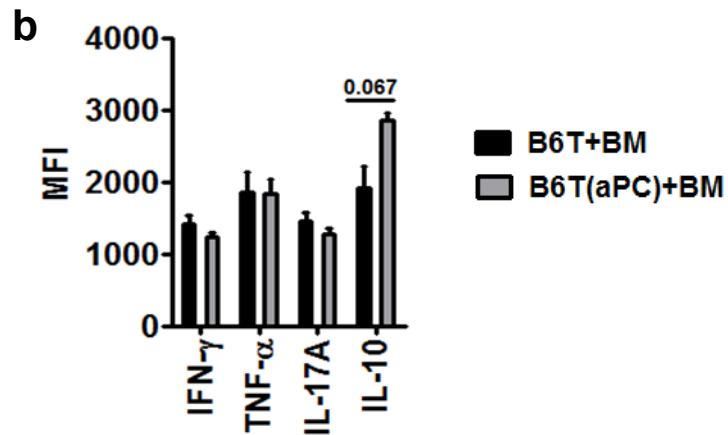

**Supplementary Fig. 3: Exemplary FACS-scans and MFI corresponding to Fig. 3f**

Recipient BALB/c mice were lethally irradiated (11Gy) and transplanted with  $5 \times 10^6$  bone marrow and  $0.5 \times 10^6$  T-cells without (B6T+BM) or with (B6T(aPC)+BM) aPC-preincubation (20nM, 1h, 37°C) from donor C57BL/6 wt mice. Recipient mice were sacrificed 2 weeks post transplantation, splenic T-cells were harvested and stained for H2<sup>b</sup>, CD4, IFN- $\gamma$ , TNF- $\alpha$ , IL-17A, or IL-10 and analysed by flow cytometry. For IFN- $\gamma$ , TNF- $\alpha$ , IL-17A, and IL-10 cells were gated on H2<sup>b</sup>CD4<sup>+</sup> cells. Control: stained for H2<sup>b</sup> and CD4. Representative FACS images (a) and Mean Fluorescence Intensity (b, MFI, Mean value  $\pm$  SEM; N=5 each group) are shown; (b: t-test).

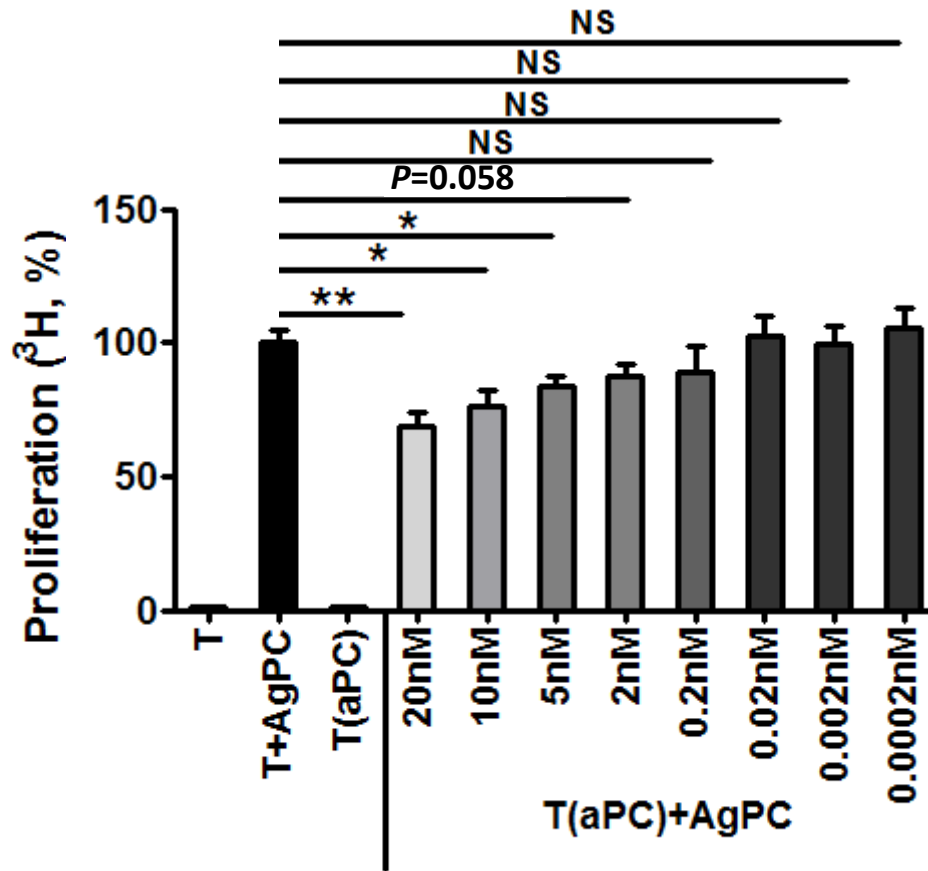

#### Supplementary Figure 4: Dose-response of aPC in the MLR

Following preincubation of human pan-T-cells with various concentrations of aPC (concentration as indicated, preincubation for 1h in AIM V medium) T-cells were co-cultured with irradiated human allogenic antigen-presenting cells for 96h. Allogenic T-cell reactivity was measured by thymidine incorporation during the final 16h. Mean value  $\pm$  SEM of at least 3 independent experiments, each containing cells from three different donors; \* $P$ <0.05, \*\* $P$ <0.01, NS: not significant (t-test).

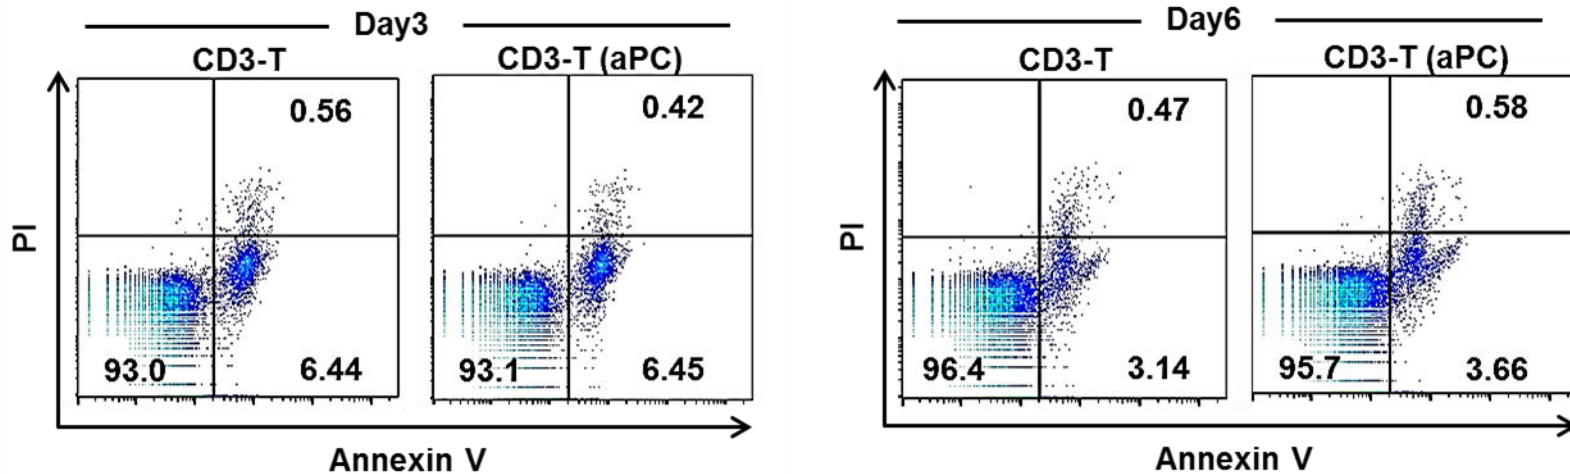

**Supplementary Fig. 5: aPC has no impact on apoptosis in allogenic stimulated human T-cells**

Human T-cells were stimulated with allogenic AgPC for 3 or 6 days and apoptosis was determined by annexin V and PI staining in CD3 T-cells. Representative FACS images of three independent repeat experiments are shown.

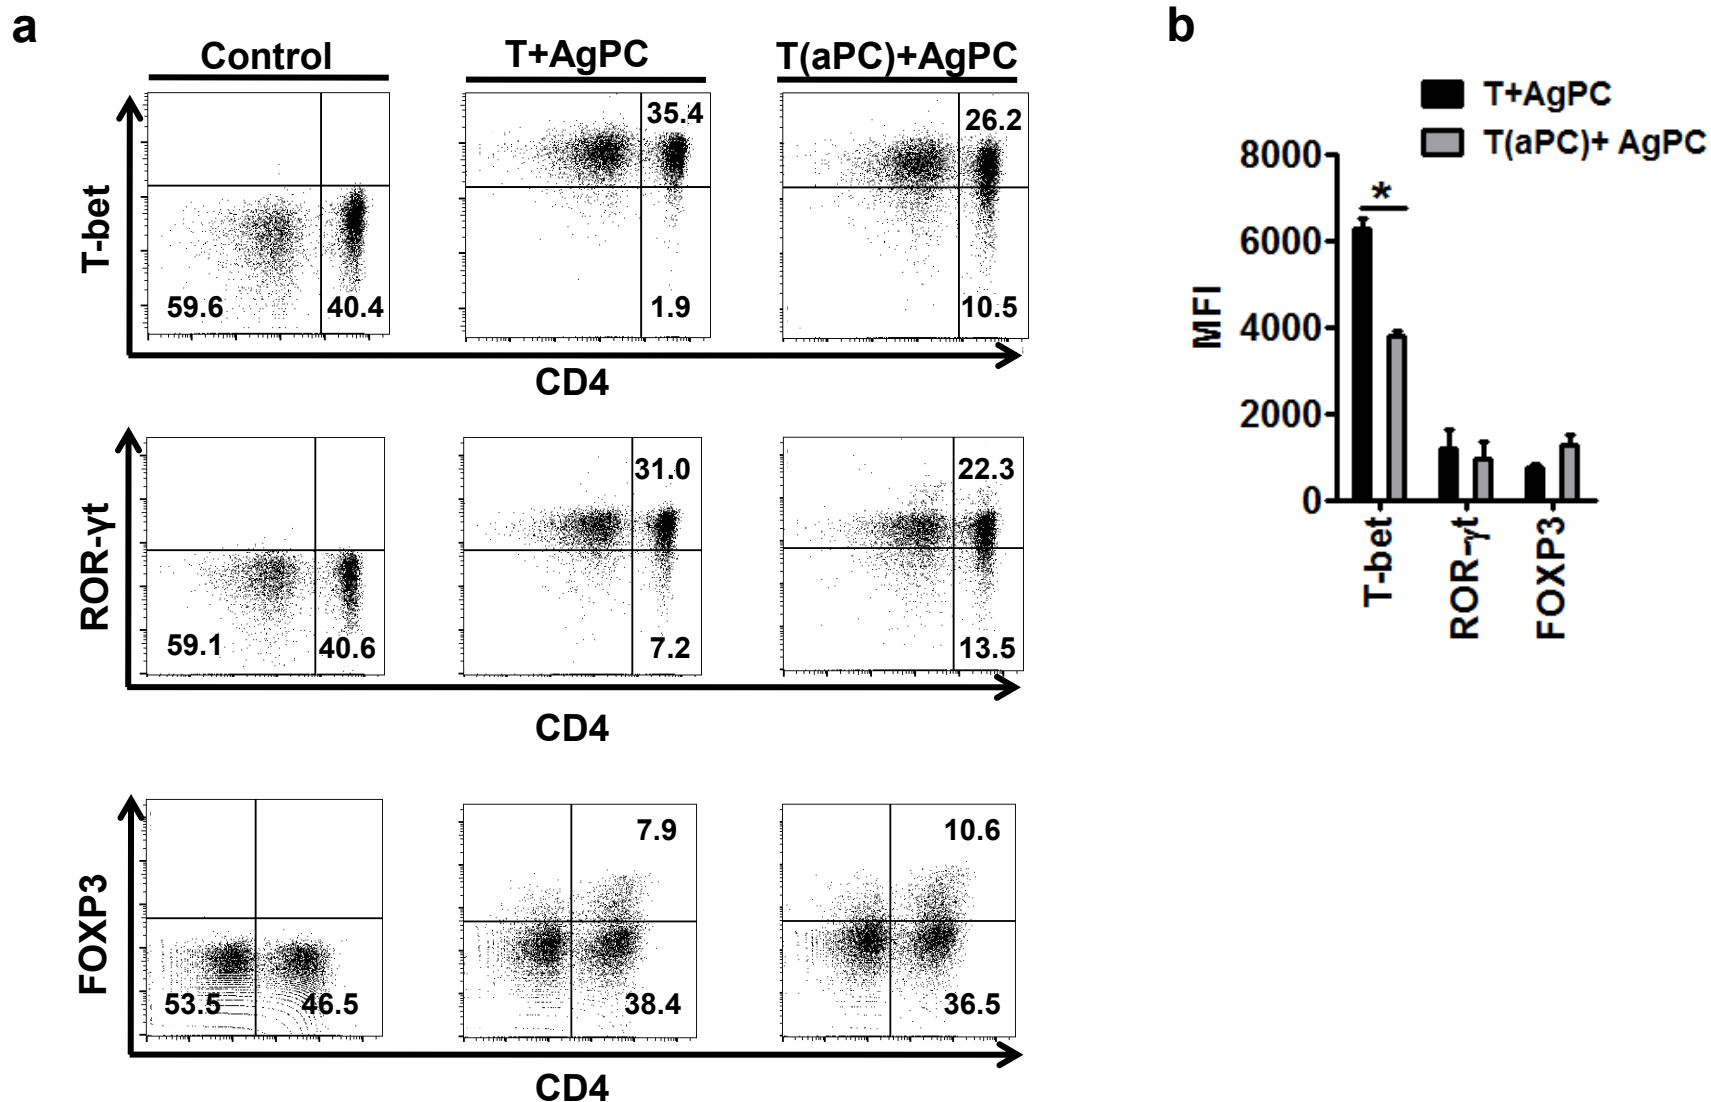

**Supplementary Fig. 6: Exemplary FACS-scans corresponding to Fig. 4d**

aPC-preincubation of human pan T-cells reduces the frequency of CD4<sup>+</sup>T-bet<sup>+</sup> and CD4<sup>+</sup>ROR- $\gamma$ t<sup>+</sup> T-cells, while increasing the frequency of CD4<sup>+</sup>FOXP3<sup>+</sup> regulatory T-cells, as measured by flow cytometry after 48h of MLR. For T-bet, ROR- $\gamma$ t, and FOXP3 cells were gated on lymphocytes. Control: stained for CD4 only. Representative FACS images (a) and Mean Fluorescence Intensity (b, MFI, Mean value  $\pm$  SEM; N=5 each group) are shown; \*P<0.05 (b: t-test).

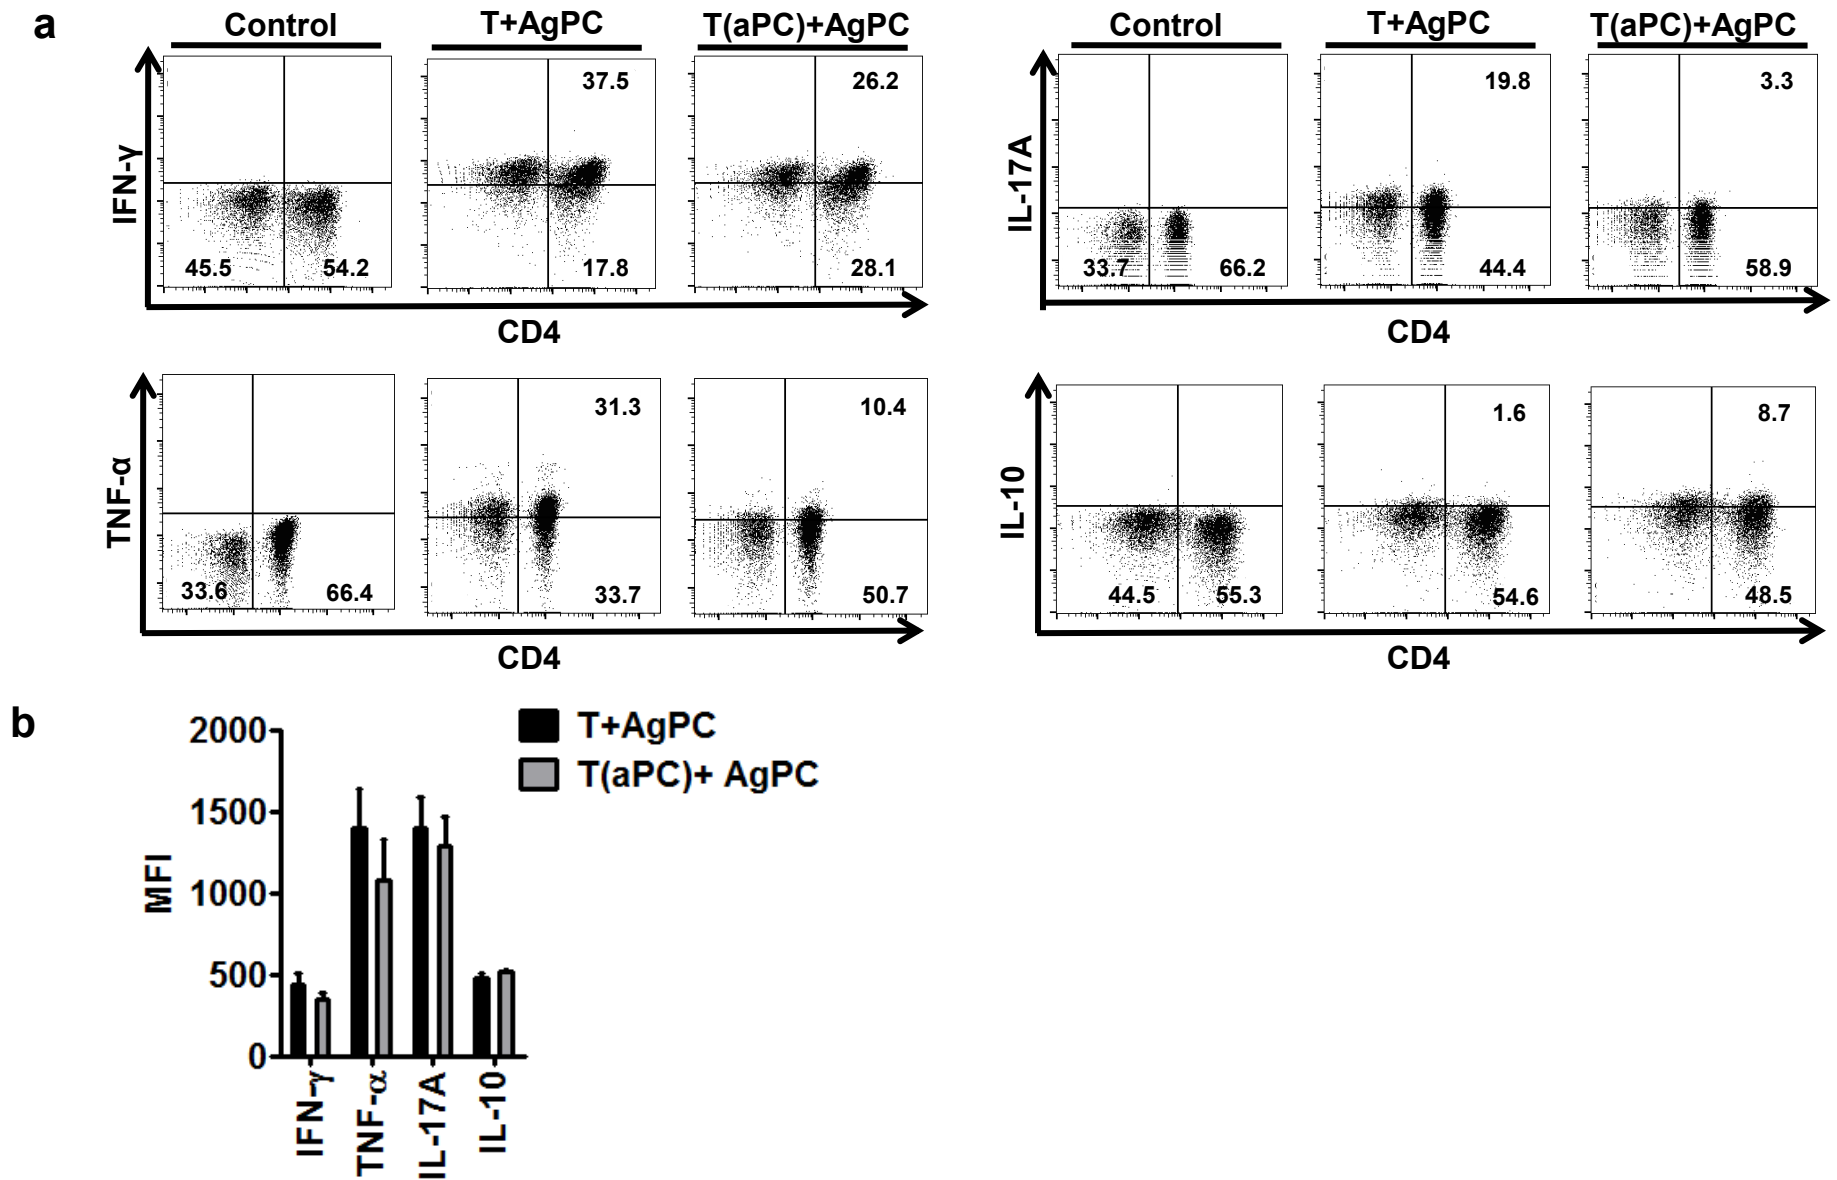

**Supplementary Fig. 7: Exemplary FACS corresponding to Fig. 4e**

aPC-preincubation of human pan T-cells reduces expression of the pro-inflammatory cytokines IFN- $\gamma$ , TNF- $\alpha$ , and IL-17A, while that of IL-10 is increased as measured by flow cytometry after 48h of MLR. For IFN- $\gamma$ , TNF- $\alpha$ , IL-17A, or IL-10, cells were gated on lymphocytes. Control: stained for CD4 only. Representative FACS images (a) and Mean Fluorescence Intensity (b, MFI, Mean value  $\pm$  SEM; N=5 each group) are shown.



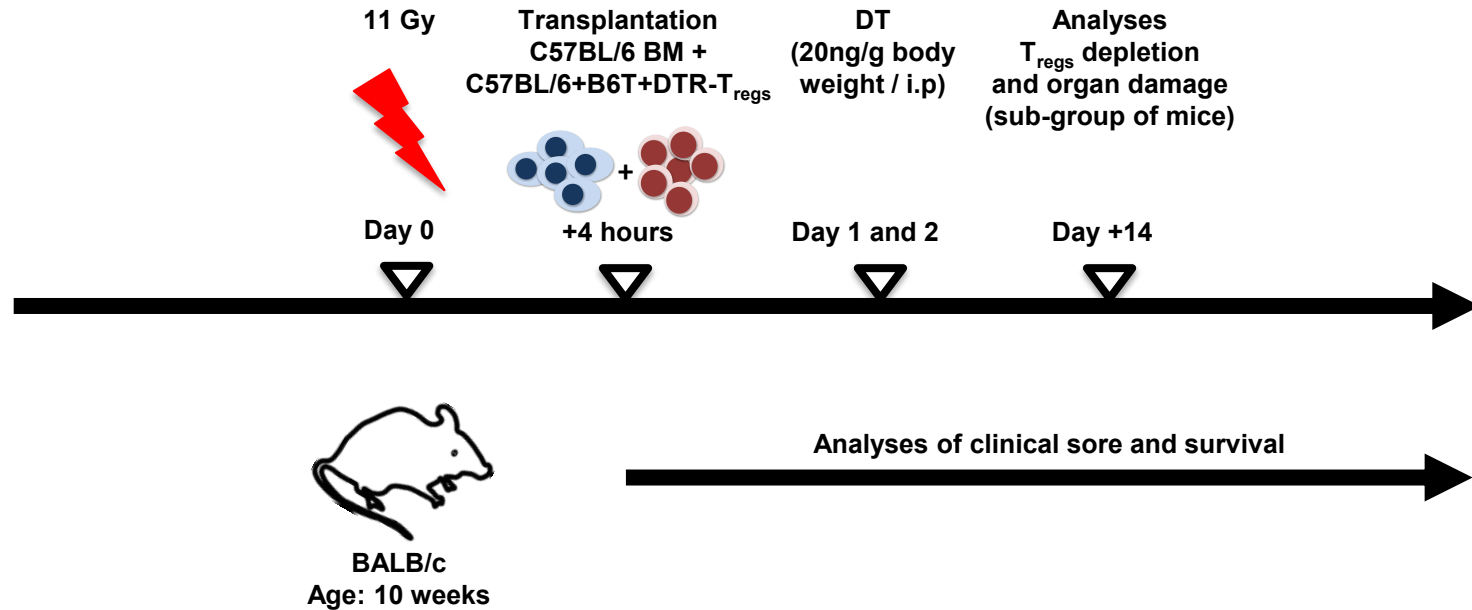

**Supplementary Fig. 8: Scheme presenting experimental approach of transplantation of DTR-T<sub>reg</sub> in mice.**

Experimental approach for depletion of T<sub>regs</sub> in mice transplanted with DEREg derived T<sub>regs</sub>. BALB/c mice, age 10 weeks, were irradiated with a single dose (11 Gy). Post-irradiation (after 4h) mice were transplanted with C57BL/6 derived bone marrow cells ( $5 \times 10^6$ ), C57BL/6 derived T-cells ( $0.4 \times 10^6$ ) and T<sub>regs</sub> ( $0.1 \times 10^6$ ) obtained from DEREg mice expressing the diphtheria toxin receptor (DTR) and eGFP under the control of the FOXP3 promoter. T<sub>regs</sub> were preincubated with aPC (20 nM, in AIM V medium) or left untreated (only AIM V medium) for 1h. On day 1 and 2 mice were injected with diphtheria toxin (DT, 20ng/g body weight /intraperitoneal injection (i.p)). Depletion of T<sub>regs</sub> was ascertained on day 14 by isolating splenocytes and determining the frequency of GFP expressing T<sub>regs</sub> cells in a subgroup of mice. Other mice were continuously monitored and a clinical score to quantitate GvHD severity was generated. See material and methods section for further details.

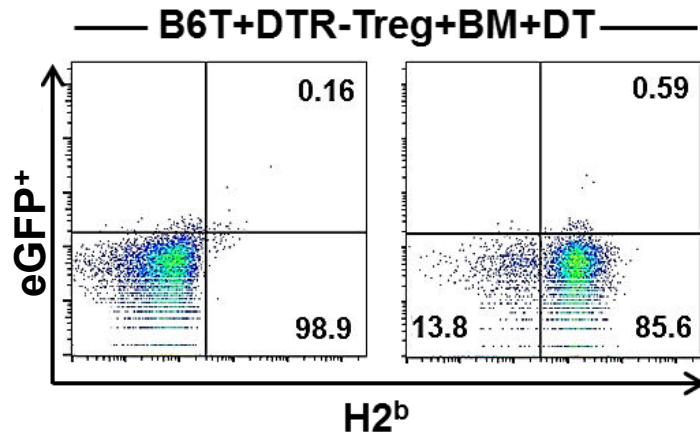

**Supplementary Fig. 9: Depletion of donor GFP<sup>+</sup>DTR<sup>+</sup>-T<sub>regs</sub>**

Recipient mice were transplanted with C57BL/6 derived bone marrow cells ( $5 \times 10^6$ ), C57BL/6 derived T-cells ( $0.4 \times 10^6$ ) and T<sub>regs</sub> ( $0.1 \times 10^6$ ) obtained from DEREK mice on day 0 and injected with DT (20ng/g body weight, i.p.) on day 1 and 2 (B6T+DTR-Treg+BM+DT). Splenic donor cells (H2<sup>b</sup><sup>+</sup>) were analysed for GFP<sup>+</sup> DTR-Treg in transplanted mice by FACS on day 14. Exemplary FACS images shown (left: H2<sup>b</sup> negative control, right: H2<sup>b</sup>+eGFP<sup>+</sup> T<sub>regs</sub>).

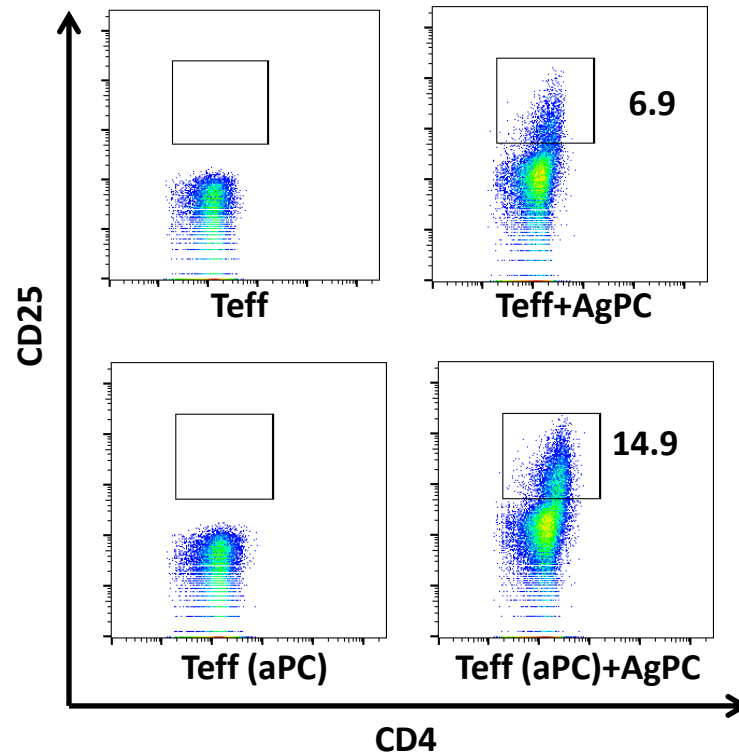

**Supplementary Fig. 10: Exemplary FACS corresponding to Fig 5e**

Preincubation of human effector T-cells ( $CD4^+CD25^-$ ) with aPC induces regulatory cells ( $CD4^+CD25^+$ ). Effector T-cells without ( $T_{eff}$ ) and with ( $T_{eff}(aPC)$ ) aPC-preincubation were stimulated with AgPC for 96h. Cells were measured by FACS and analysed by FlowJo software. Representative FACS images are shown.

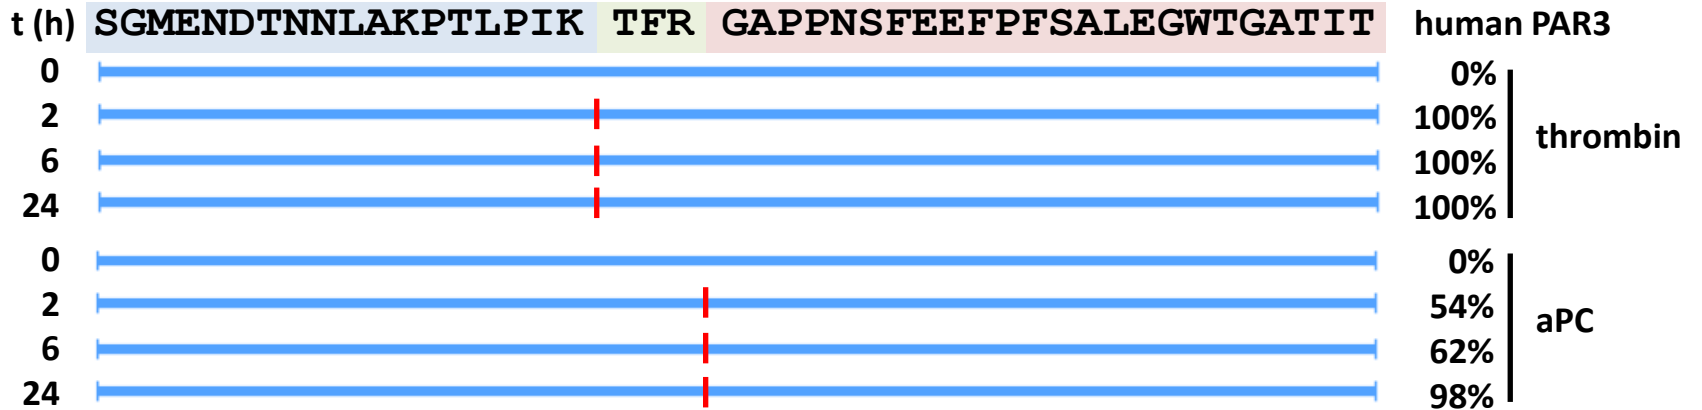

**Supplementary Fig. 11: Summary of human PAR3-N-terminal peptide cleavage analyses.** A peptide derived from the N-terminal end of human PAR3 (sequence shown at the top) was incubated with human thrombin (10 nM) or human aPC (500 nM). Proteolysis was determined at indicated time-points (left, t(h)). Cleavage sites are shown in red lines and estimated cleavage efficiency is shown in percentage (right).

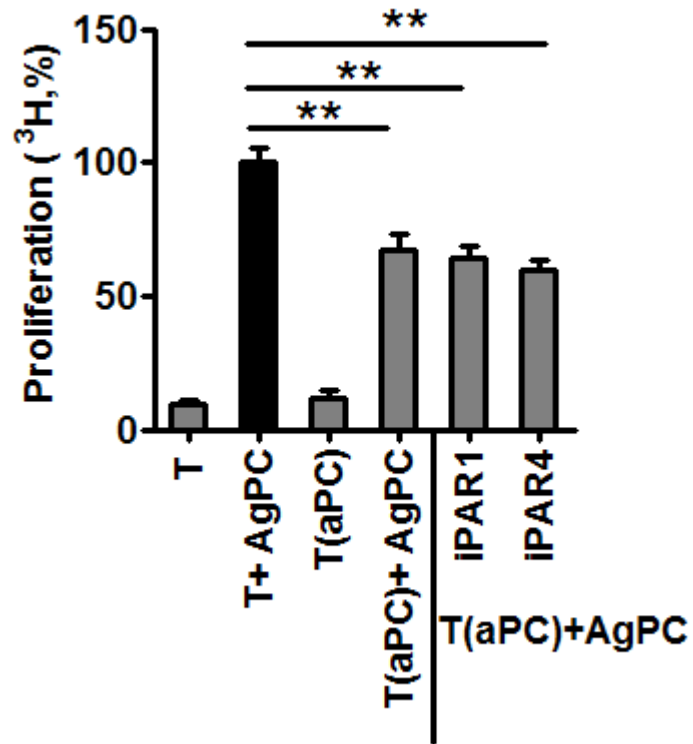

**Supplementary Fig. 12: Inhibitory peptides against PAR1 and PAR4 failed to abolish aPC's effect in the MLR**  
 Preincubation of human peripheral blood T-cells (T) with inhibitory peptides against PAR1 (iPAR1) or PAR4 (iPAR4) prior to aPC-preincubation and MLR does not abrogates aPC's inhibitory effect in regard to T-cell reactivity. Mean value  $\pm$  SEM); \*\*P<0.01 (t- test).

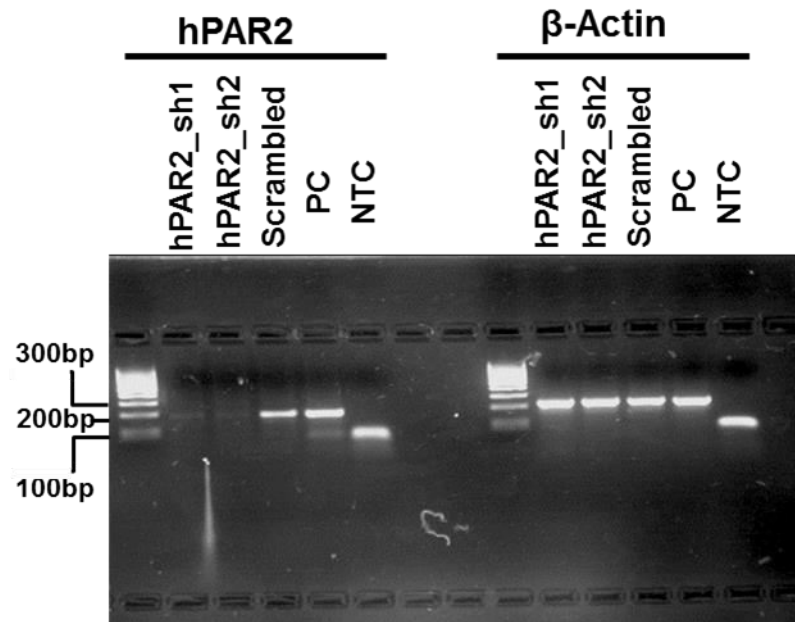

**Supplementary Fig. 13: Knock down of PAR2 in primary human T-cells.** Primary human T-cells were transfected with lentiviral particles mediating expression of two disjunct shRNA (hPAR2\_sh1, hPAR2\_sh2) against human PAR2 (178bp) or a control shRNA (scrambled). Both shRNAs efficiently suppressed expression of PAR2, while the control shRNA had no effect. Beta actin ( $\beta$ -Actin-227bp) was used as loading control. Exemplary image of an RT-PCR analyses conducted on day 2 after transfection. SM: size marker, PC: positive control (non-transduced human pan-T-cells; NTC: negative control (no reverse transcriptase).

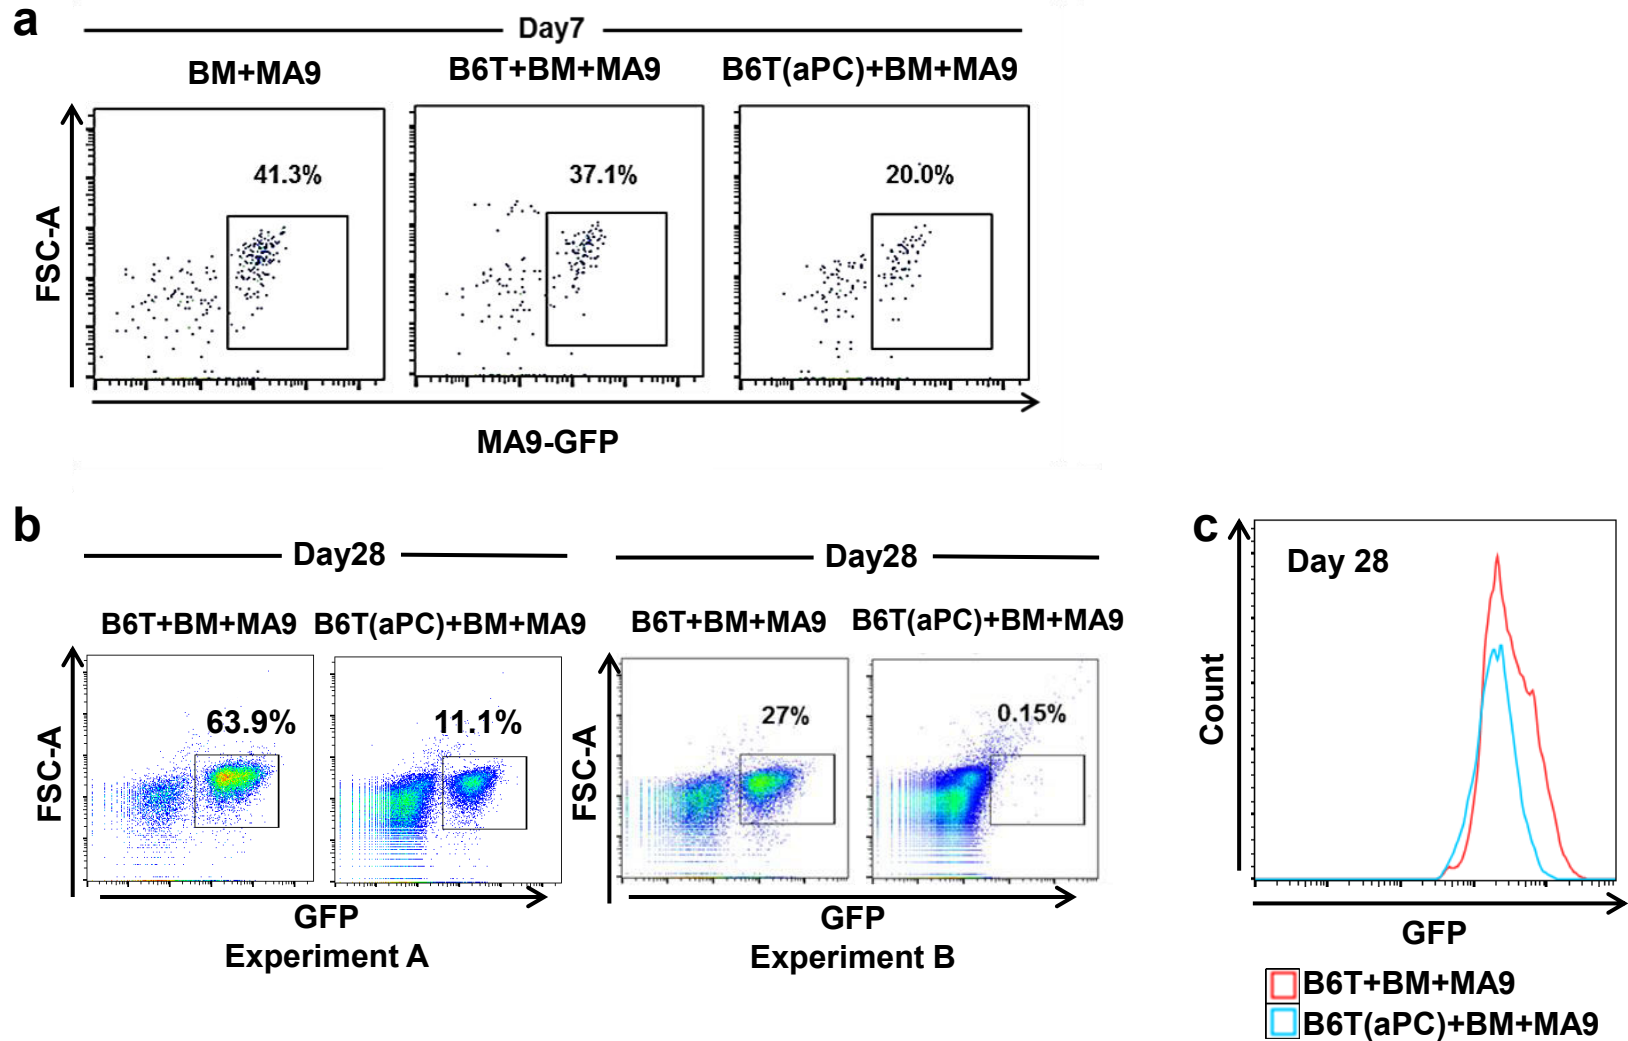

**Supplementary Fig. 14: Exemplary FACS-scans corresponding to Fig. 10b,c**

Lethally irradiated (11Gy) recipient BALB/c mice were transplanted with  $5 \times 10^6$  C57BL/6 derived bone marrow cells, 5000 GFP+MA9 leukemic cells, and  $0.5 \times 10^6$  C57BL/6 T-cells without (B6T+BM+MA9) or with (B6T(aPC)+BM+MA9) aPC-preincubation. In mice transplanted with aPC preincubated T-cells leukemic load (determined by flow cytometry on day 7 (a) and day 28 (b,c) after transplantation in peripheral blood samples) is markedly decreased. Representative FACS images (a,b) and histogram (c) are shown.

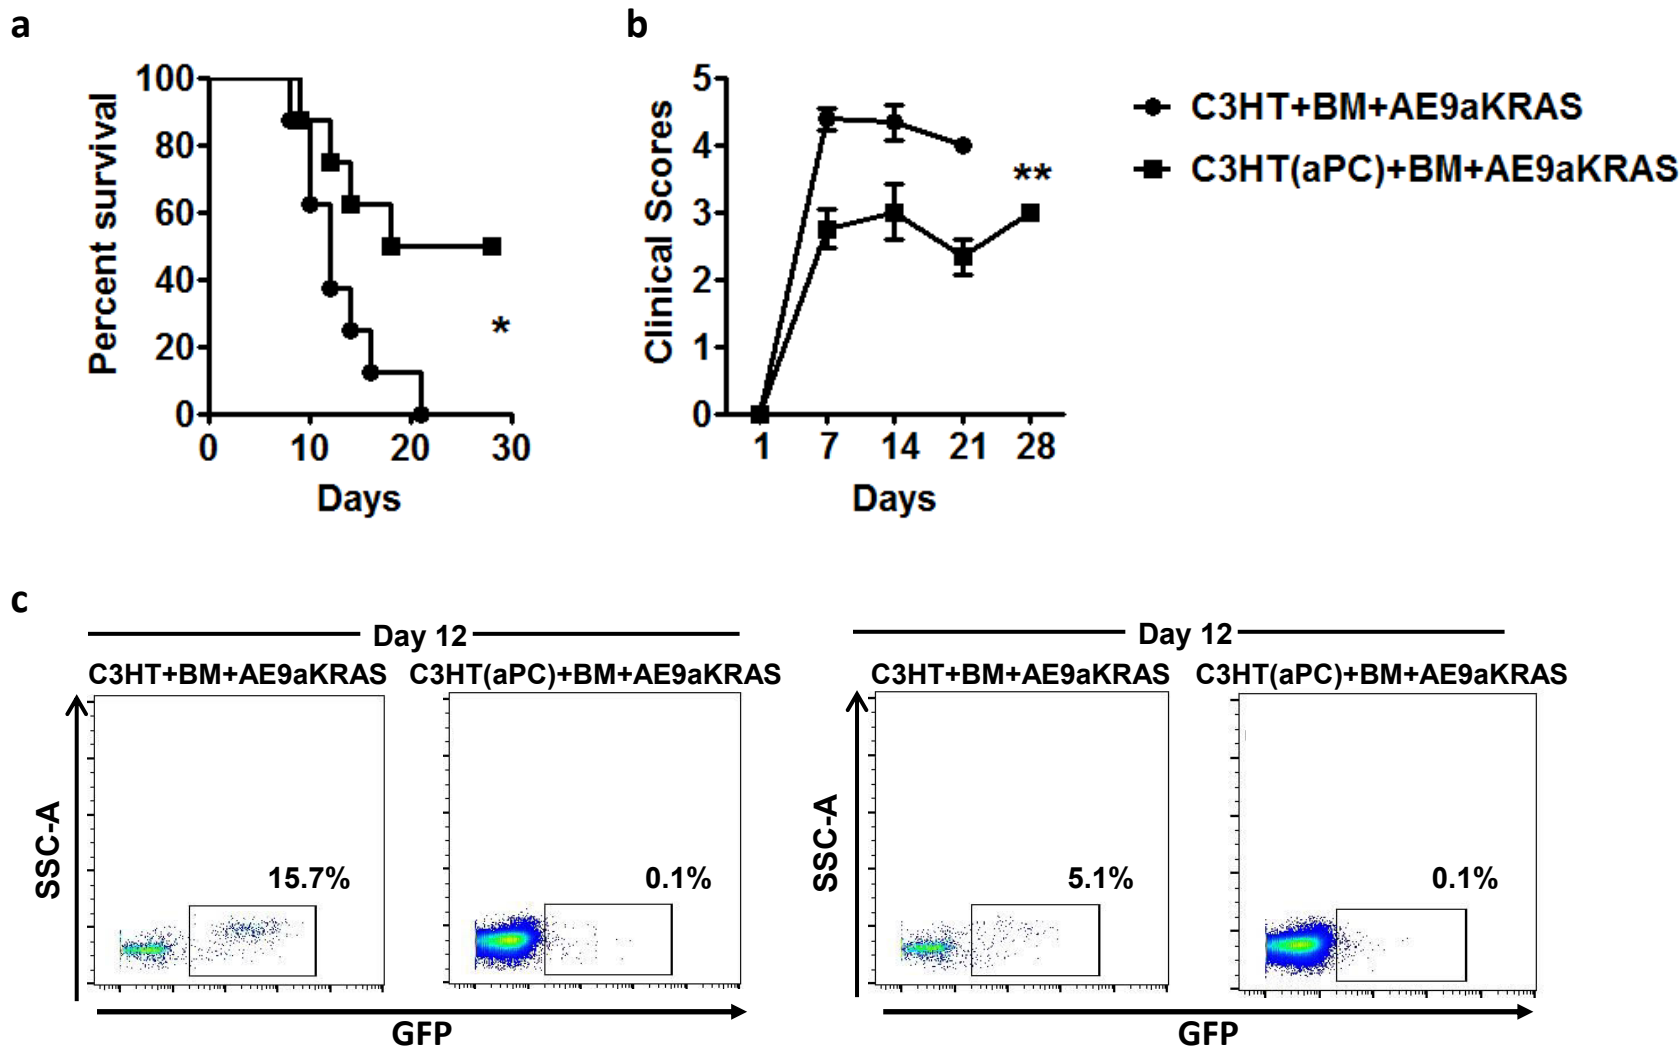

### Supplementary Fig. 15: aPC preincubation of T-cells does not impair GvL effect

Lethally irradiated (13Gy) recipient C57BL/6 mice were transplanted with  $5 \times 10^6$  C3H derived bone marrow cells,  $2 \times 10^4$  GFP<sup>+</sup>AE9aKRAS leukemic cells, and  $1 \times 10^6$  C3H T-cells without (C3HT+BM+AE9aKRAS) or with (C3H(aPC)+BM+AE9aKRAS) aPC-preincubation. Survival curve (a) and clinical scores (b) are shown. In mice transplanted with aPC preincubated T-cells leukemic load (determined by flow cytometry on day 12 (c) after transplantation in peripheral blood samples) is markedly decreased. Representative FACS images (c) are shown.. Mean value  $\pm$  SEM; N=8 each group are shown; \*P<0.05, \*\*P<0.01 (log-rank test).



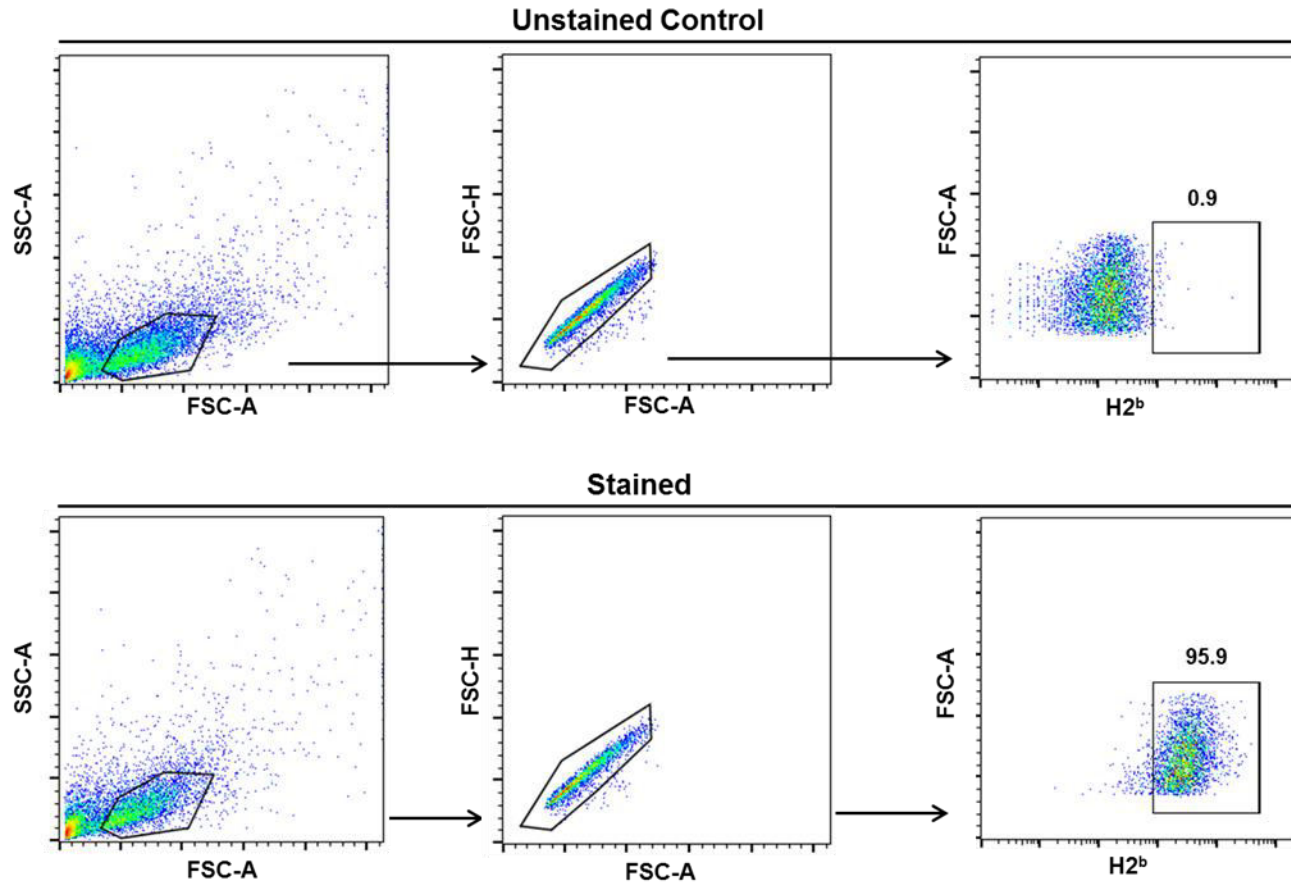

**Supplementary Fig. 16:** Representative gating strategy for unstained control and stained samples corresponding to Supplementary Figure 1 (part 1).

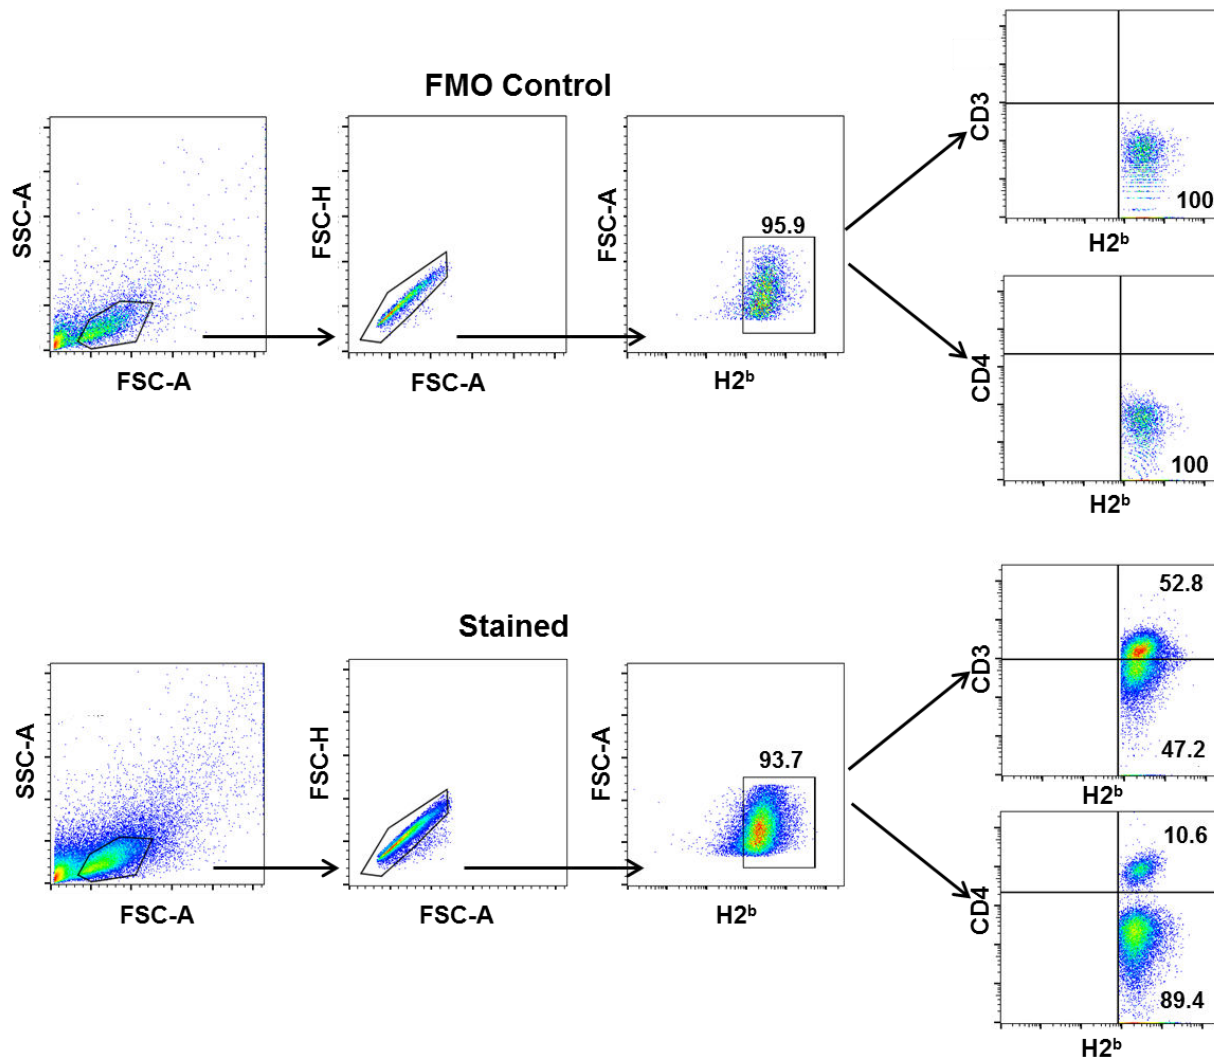

**Supplementary Fig. 17:** Representative gating strategy for FMO control and stained samples corresponding to Supplementary Figure 1 (part 2).

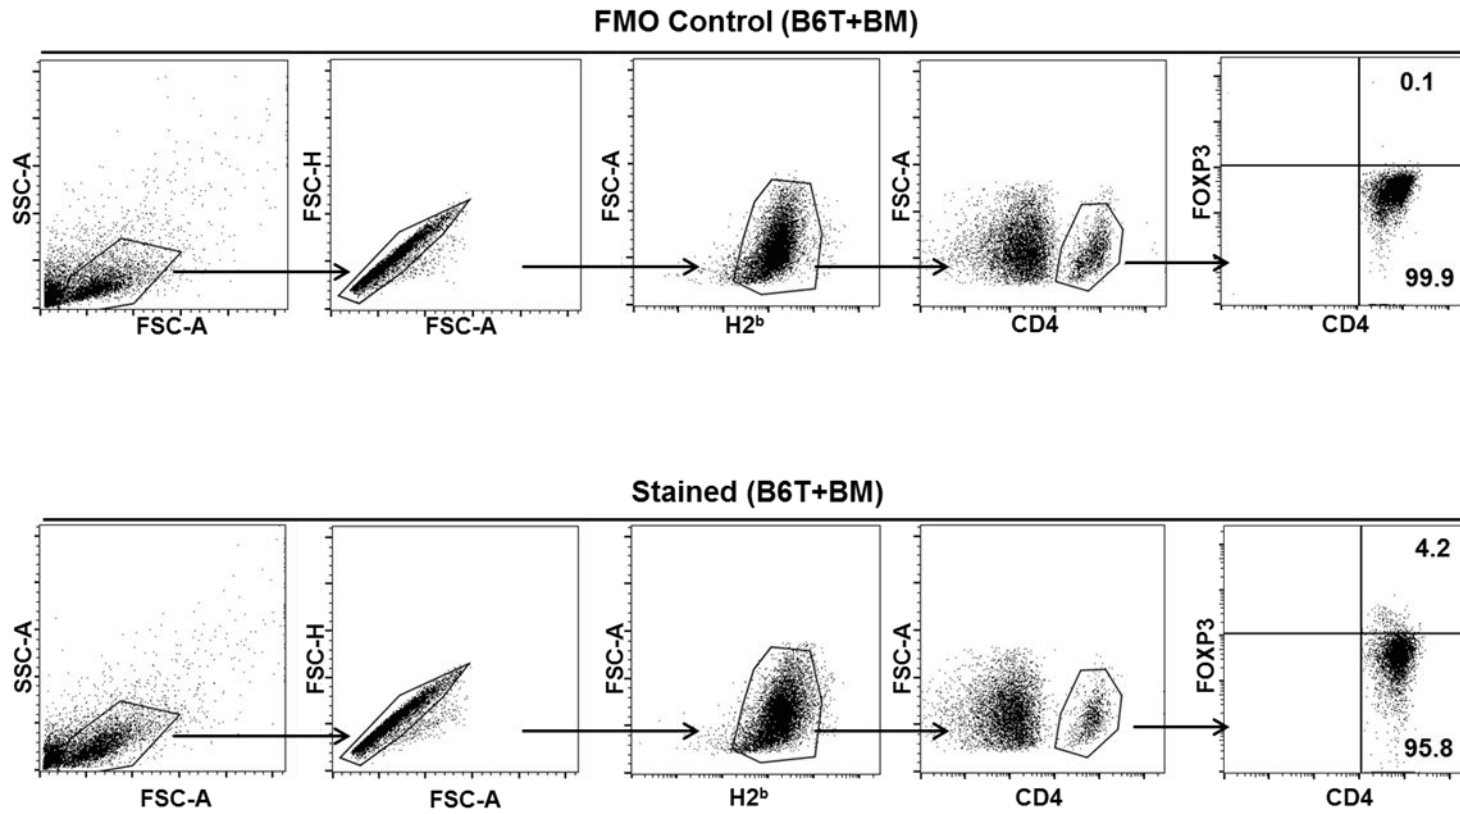

**Supplementary Fig. 18:** Representative gating strategy for FMO control and stained samples corresponding to Supplementary Figure 2.

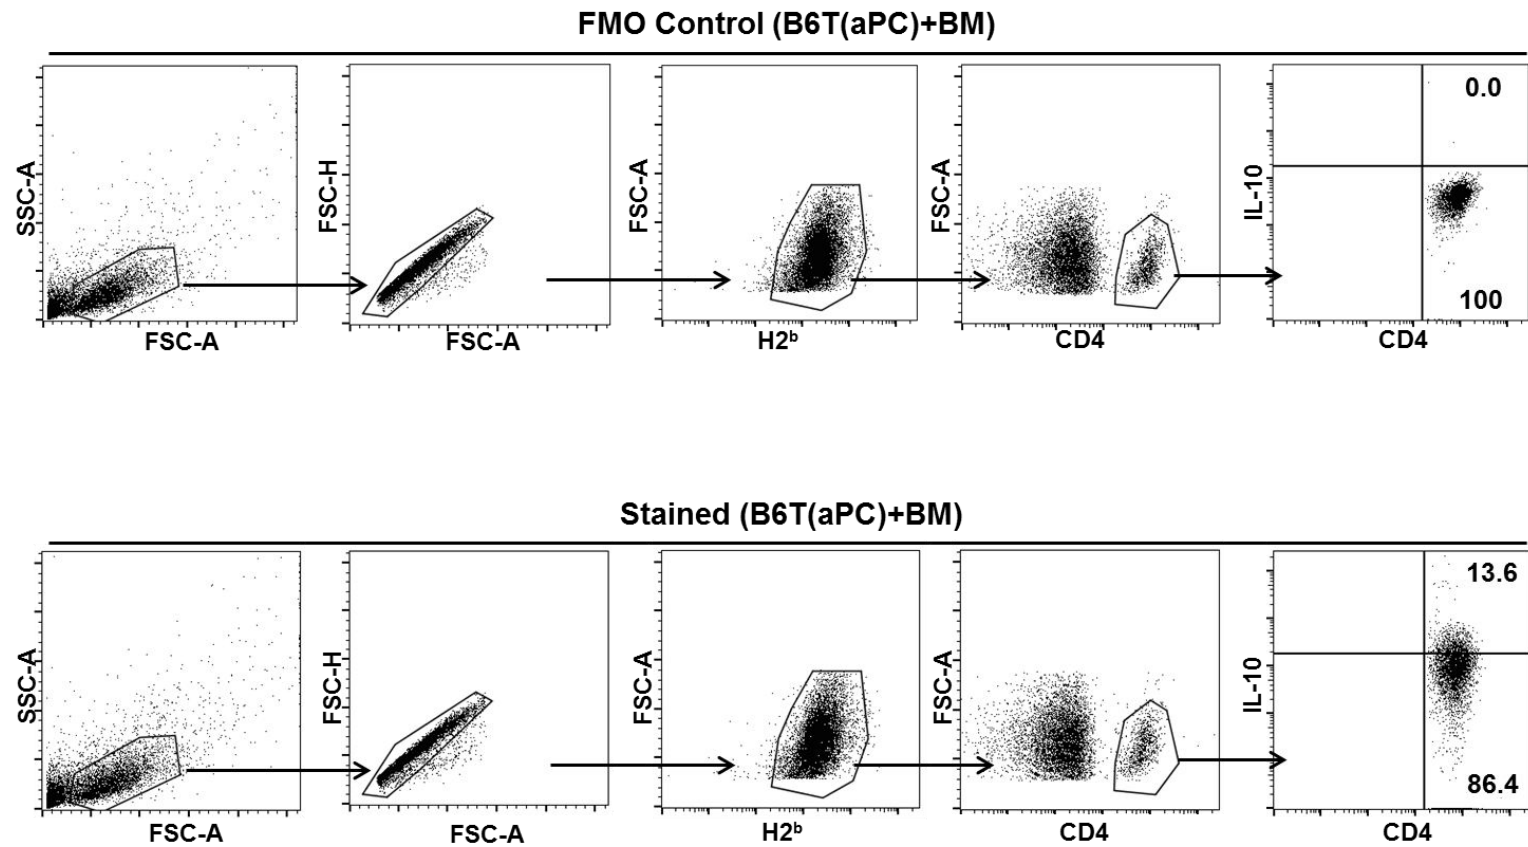

**Supplementary Fig. 19:** Representative gating strategy for FMO control and stained samples corresponding to Supplementary Figure 3.

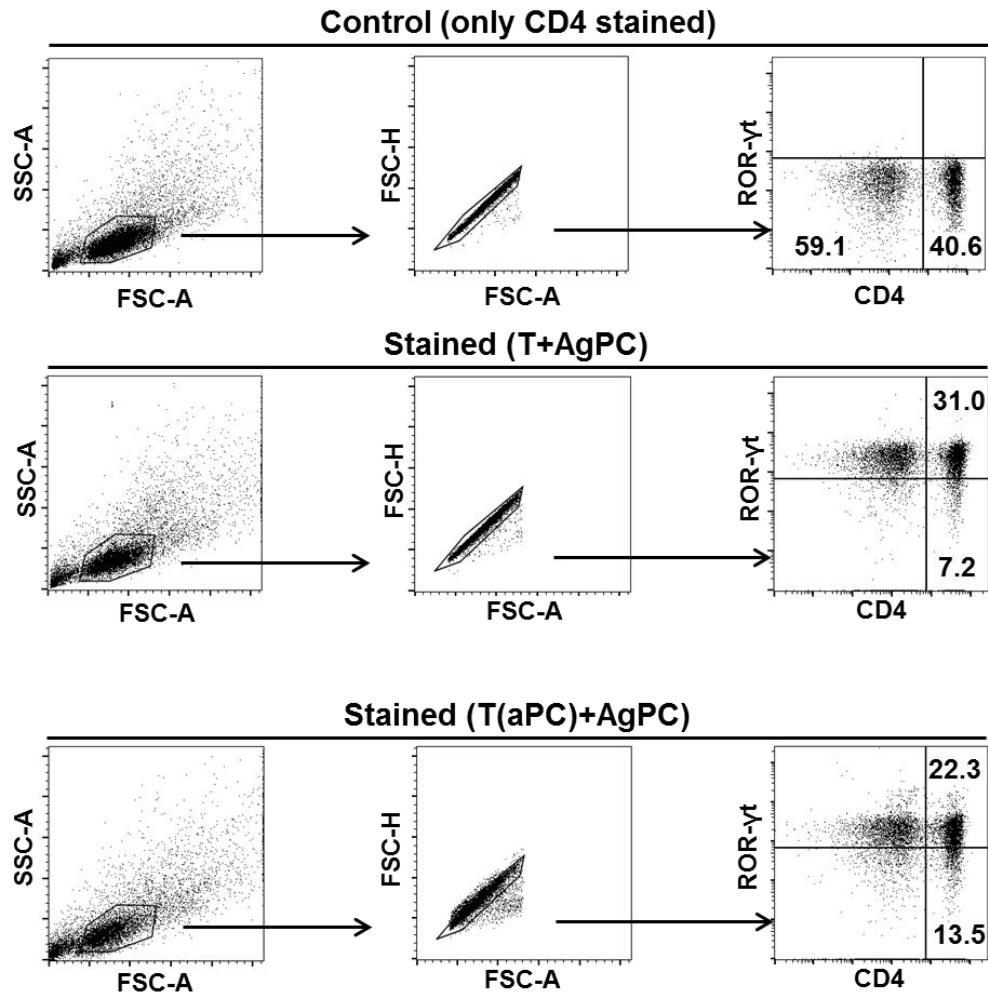

**Supplementary Fig. 20:** Representative gating strategy for control and stained samples corresponding to Supplementary Figure 6.

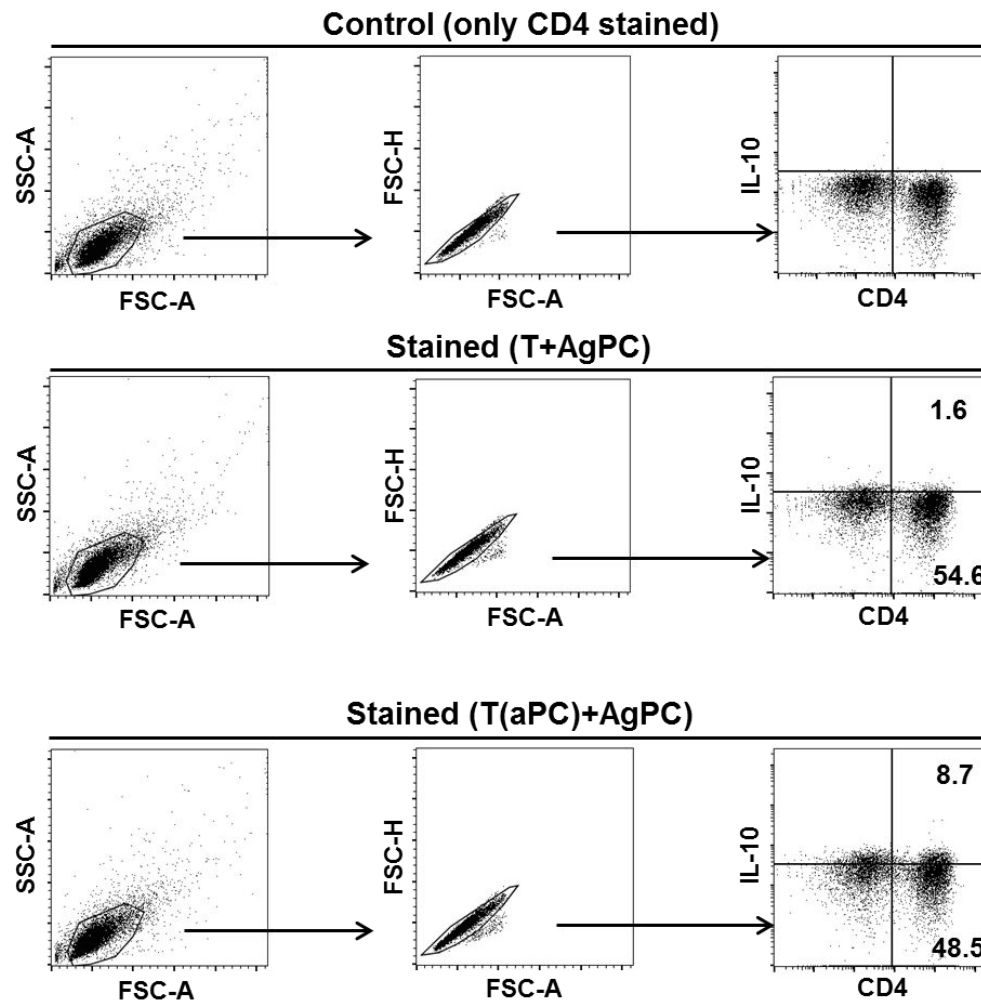

**Supplementary Fig. 21:** Representative gating strategy for control and stained samples corresponding to Supplementary Figure 7.

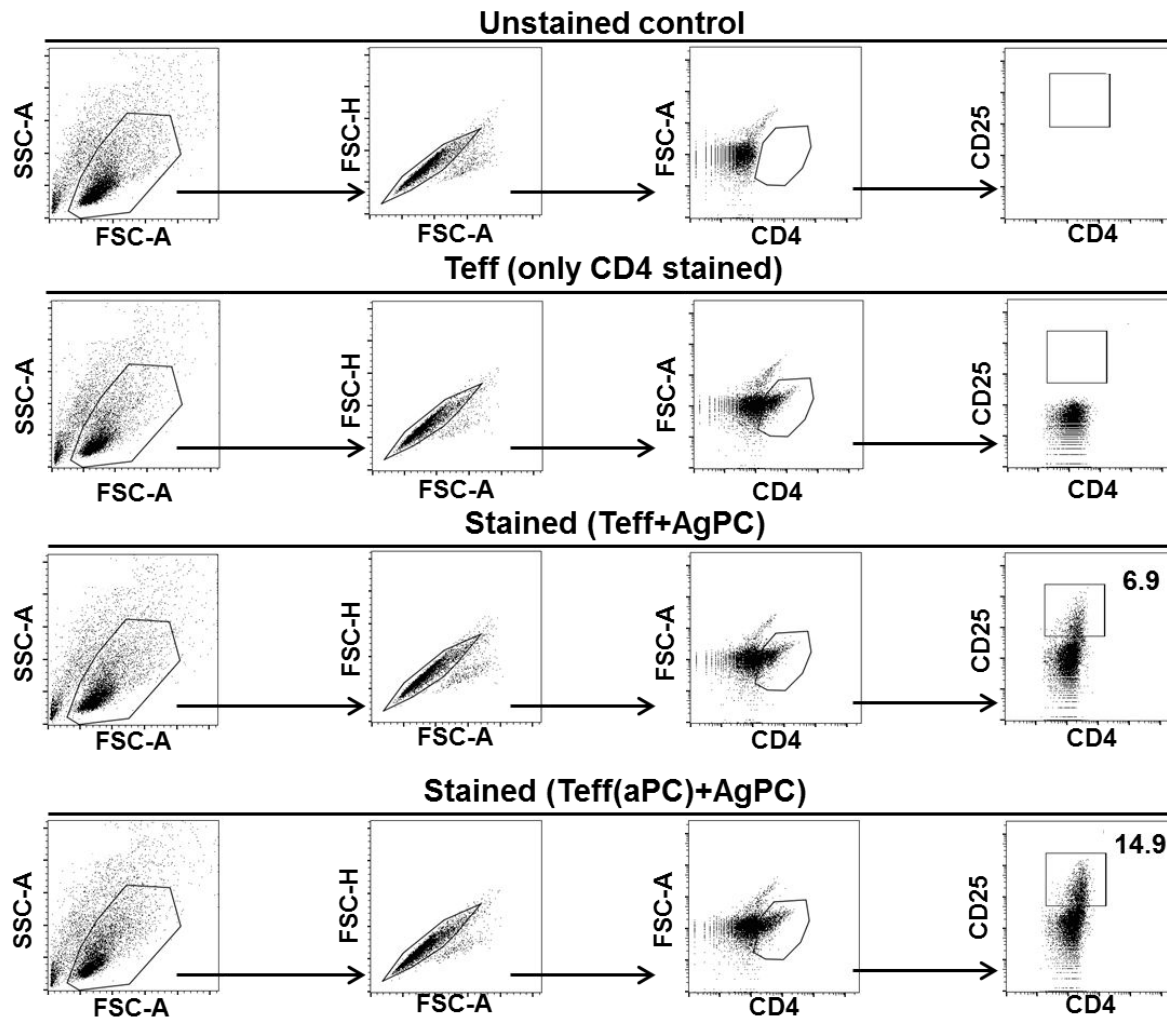

**Supplementary Fig. 22:** Representative gating strategy for control and stained samples corresponding to Supplementary Figure 10.

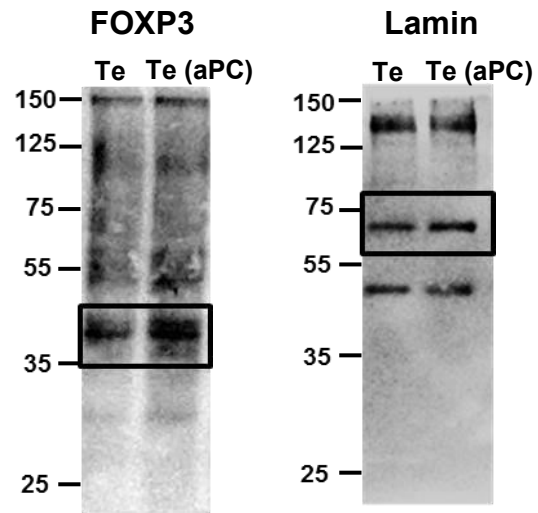

**Supplementary Fig. 23:** Full western blot images corresponding to Fig. 5f.



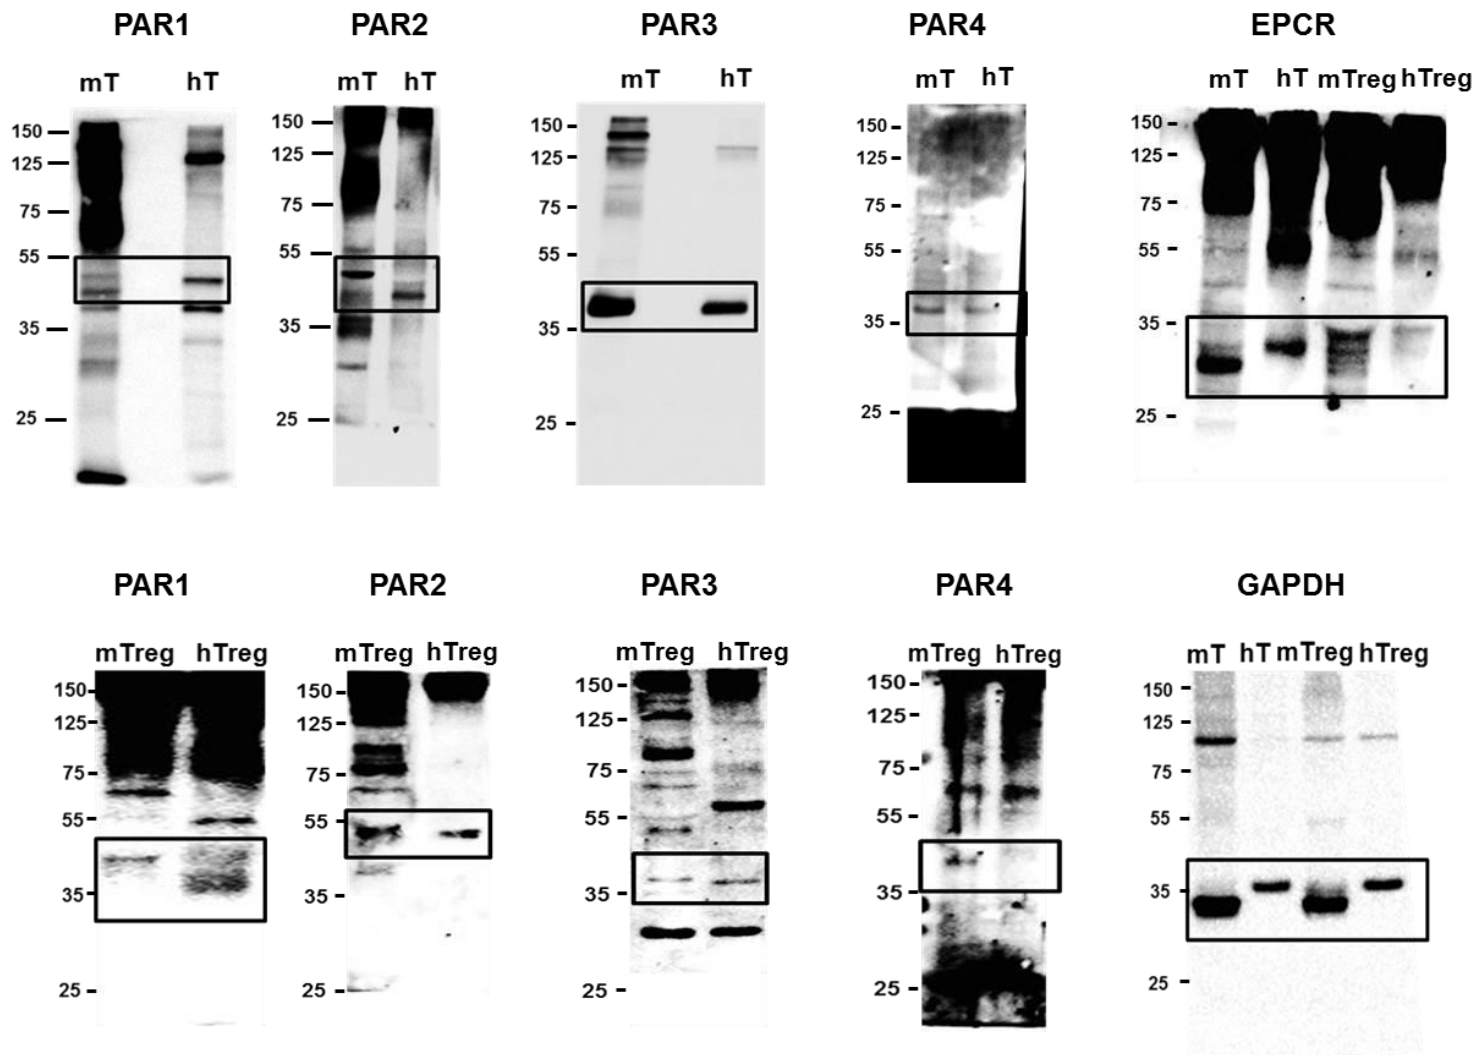

**Supplementary Fig. 24:** Full western blot images corresponding to Fig. 6a.

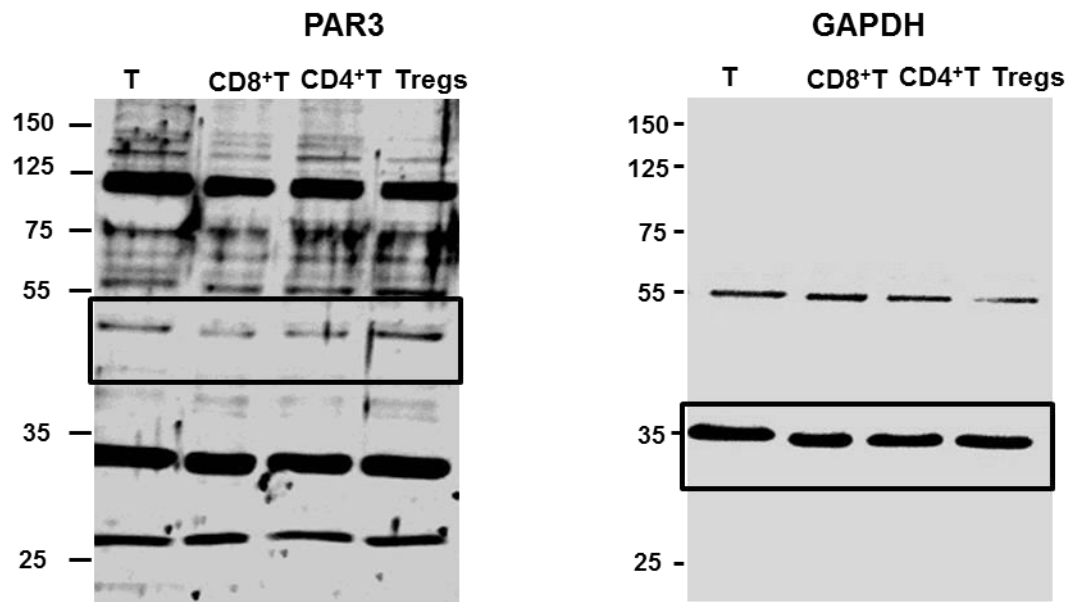

**Supplementary Fig. 25:** Full western blot images corresponding to Fig. 6b.

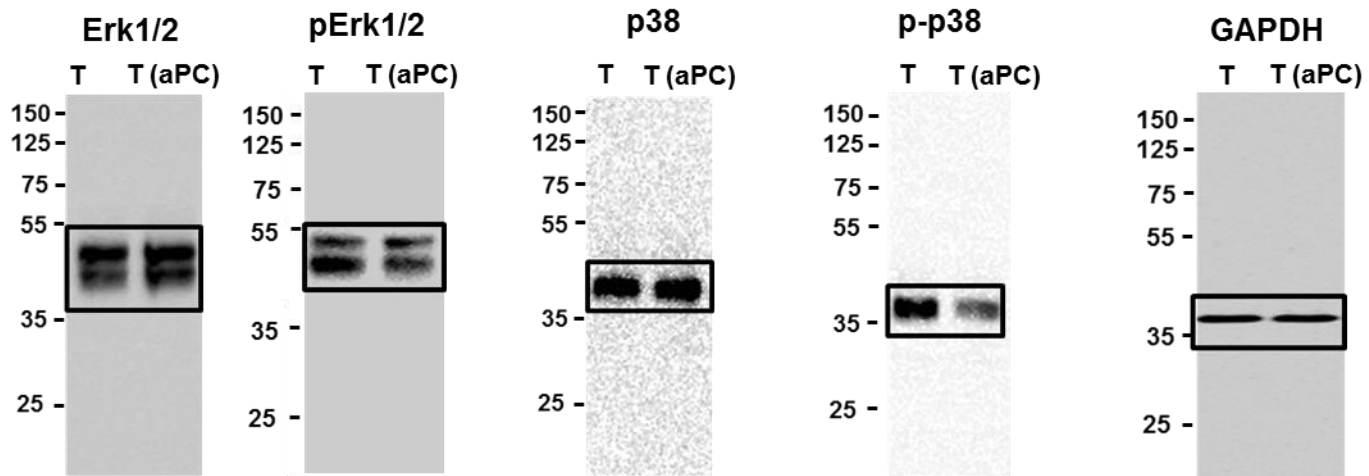

**Supplementary Fig. 26:** Full western blot images corresponding to Fig. 7c.

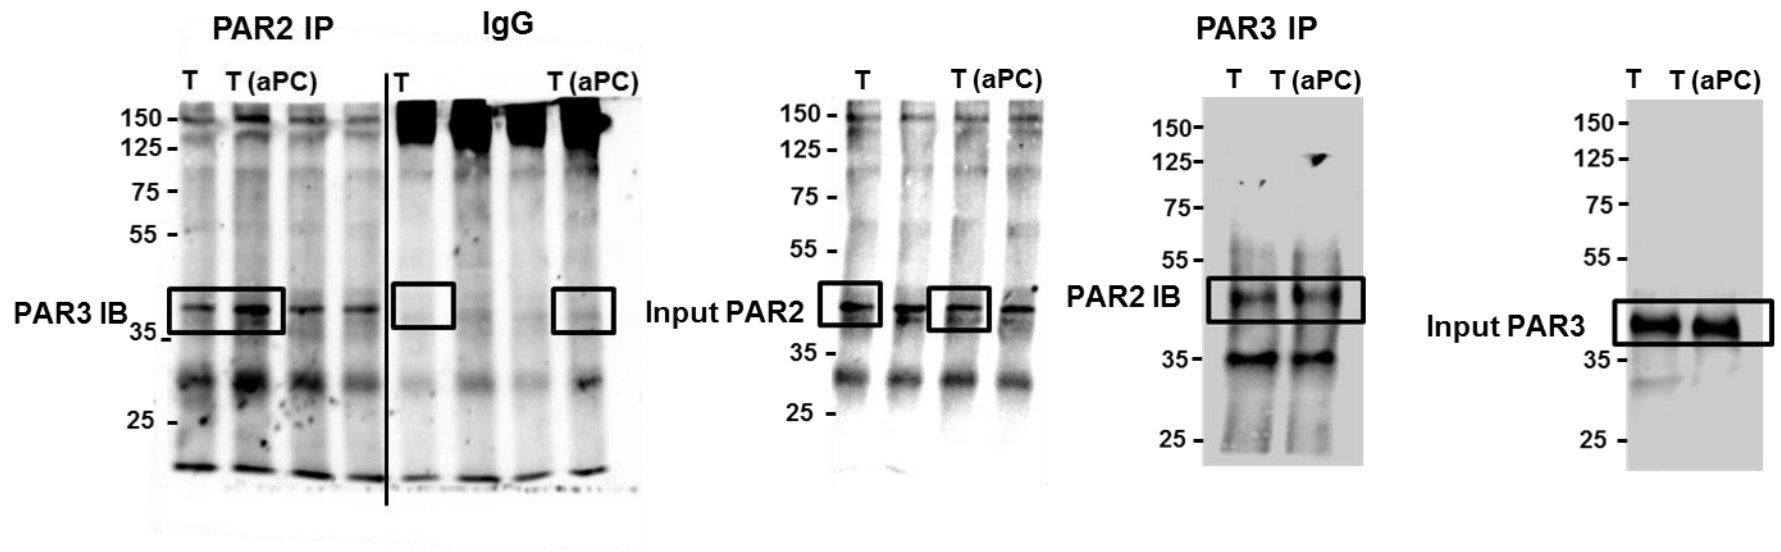

**Supplementary Fig. 27:** Full western blot images corresponding to Fig. 7d.

**Supplementary Table 1**

| <b>Antibody</b>              | <b>Antibody Target</b>                       | <b>Clone</b> | <b>Host</b> | <b>Dilution</b> | <b>Source</b>  |
|------------------------------|----------------------------------------------|--------------|-------------|-----------------|----------------|
| H-2D <sup>b</sup> -FITC      | mouse MHC class I, H-2D <sup>b</sup>         | 28-14-8      | Mouse       | 1:400           | eBioscience    |
| H-2D <sup>b</sup> -eFluor450 | mouse MHC class I, H-2D <sup>b</sup>         | 28-14-8      | Mouse       | 1:400           | eBioscience    |
| H-2K <sup>b</sup> -FITC      | mouse MHC class I, H-2Kd and H-2Dd           | 34-1-2S      | Mouse       | 1:400           | eBioscience    |
| CD4-FITC                     | human CD4                                    | OKT4         | Mouse       | 1:400           | eBioscience    |
| CD4-APC                      | mouse CD4                                    | RM4-5        | Rat         | 1:1000          | BioLegend      |
| FOXP3-PE                     | mouse FOXP3                                  | FJK-16S      | Rat         | 1:400           | eBioscience    |
| FOXP3-PE-Cy7                 | human FOXP3                                  | PCH101       | Rat         | 1:400           | eBioscience    |
| FOXP3-AlexaFluor647          | human, mouse FOXP3                           | 150D         | Mouse       | 1:400           | BioLegend      |
| T-bet-PE                     | mouse, human T-bet                           | 4B10         | Mouse       | 1:200           | eBioscience    |
| TNF- $\alpha$ -PE            | mouse TNF- $\alpha$                          | MP6-XT22     | Rat         | 1:200           | eBioscience    |
| IFN- $\gamma$ -PE            | mouse IFN- $\gamma$                          | XMG1.2       | Rat         | 1:2000          | eBioscience    |
| IL-10-PE                     | mouse IL-10                                  | JES5-16E3    | Rat         | 1:200           | BioLegend      |
| IL-17A-PE                    | mouse IL-17A                                 | TC11-18H10   | Rat         | 1:100           | BD             |
| Ror- $\gamma$ t-PE           | mouse Ror- $\gamma$ t                        | AFKJS-9      | Rat         | 1:400           | eBioscience    |
| T-bet-PerCp-Cy5.5            | mouse, human T-bet                           | 4B10         | Mouse       | 1:1000          | eBioscience    |
| TNF- $\alpha$ -PE            | human TNF- $\alpha$                          | MAb11        | Mouse       | 1:200           | BioLegend      |
| IFN- $\gamma$ -PE            | human IFN- $\gamma$                          | 4S.B3        | Mouse       | 1:1000          | BioLegend      |
| IL-10-PE                     | human IL-10                                  | JES3-19F1    | Rat         | 1:200           | BioLegend      |
| IL-17A-PE                    | human IL-17A                                 | BL168        | Mouse       | 1:200           | BioLegend      |
| Ror- $\gamma$ t-PE           | human, mouse Ror- $\gamma$ t                 | AFKJS-9      | Rat         | 1:400           | eBioscience    |
| FOXP3                        | Full-length FOXP3 protein                    | 150D         | Mouse       | 1:1000          | BioLegend      |
| PAR1                         | human, mouse PAR1                            | ATAP2        | Mouse       | 1:200           | Santa Cruz     |
| PAR2                         | human, mouse PAR2                            | SAM11        | Mouse       | 1:200           | Santa Cruz     |
| PAR3                         | human, mouse PAR3                            | H103         | Rabbit      | 1:200           | Santa Cruz     |
| PAR4                         | human, mouse PAR4                            | H120         | Rabbit      | 1:200           | Santa Cruz     |
| EPCR                         | human, mouse EPCR                            | RCR-252      | Rat         | 1:500           | Sigma-Aldrich  |
| Erk1/2                       | human, mouse                                 | Polyclonal   | Rabbit      | 1:1000          | Cell Signaling |
| Phospho-Erk1/2               | Thr202/Tyr204 human, mouse                   | Polyclonal   | Rabbit      | 1:1000          | Cell Signaling |
| p38                          | human, mouse                                 | Polyclonal   | Rabbit      | 1:1000          | Cell Signaling |
| Phospho-p38                  | Thr180/Tyr182                                | Polyclonal   | Rabbit      | 1:1000          | Cell Signaling |
| CD25-APC                     | human CD25                                   | BC96         |             | 1:400           | BioLegend      |
| CD3                          | epsilon-subunit within the human CD3 complex | OKT3         | Mouse       | 1 $\mu$ g/ml    | eBioscience    |
| CD28                         | human CD28 molecule                          | CD28.2       | Mouse       | 0.5 $\mu$ g/ml  | eBioscience    |
| GAPDH                        | Human, Mouse                                 | Polyclonal   | Rabbit      | 1:20000         | Sigma-Aldrich  |
| Anti-mouse IgG               | Mouse IgG                                    |              | Horse       | 1:2000          | Cell Signaling |
| Anti-rabbit IgG              | Rabbit IgG                                   |              | Goat        | 1:2000          | Cell Signaling |
